# Supplementary material for: Evaluation of improved land use and canopy representation in BEIS v3.61 with biogenic VOC measurements in California
Source: Copernicus journal article supplement (doi:10.5194/gmd-9-2191-2016), 2016-06-16
Supplement: Supplementary file 3 [file gmd-9-2191-2016-supplement.zip]

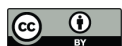

## *Supplement of*

# **Evaluation of improved land use and canopy representation in BEIS v3.61 with biogenic VOC measurements in California**

**Jesse O. Bash et al.**

*Correspondence to:* J. O. Bash ([bash.jesse@epa.gov](mailto:bash.jesse@epa.gov))

- [gmd-9-2191-2016-supplement-title-page.pdf](#)
- [Supplementary\\_figures\\_v3.pdf](#)
- [sf01.pdf](#)
- [sf02.pdf](#)
- [sf03.pdf](#)
- [sf04.pdf](#)
- [sf05.pdf](#)
- [sf06.pdf](#)
- [sf07.pdf](#)

The copyright of individual parts of the supplement might differ from the CC-BY 3.0 licence.
