# Supplementary material for: Evaluation of improved land use and canopy representation in BEIS v3.61 with biogenic VOC measurements in California
Source: Copernicus journal article supplement (doi:10.5194/gmd-9-2191-2016), 2016-06-16
Supplement: Supplementary file 4 [file gmd-9-2191-2016-supplement.zip]

## Supplementary Figures

Figure S1. Schematic of the data inputs and processing steps used to create and evaluate the Biogenic Emissions Landuse Dataset (BELD) version 4.

Figure S2. Vegetation fraction for aggregated oak and needle leaf vegetation from BELD3 (left) and BELD4 (right). Field study locations shown with red circles.

Figure S3. Distribution of hourly temperatures at the Cool and Sacramento sites during the 2009 and 2010 field campaign periods.

Figure S4. Hourly observed and modeled temperature at the core field study sites during the 2009 period.

14

15 Figure S5. Hourly observed and modeled temperature at Ameriflux tower sites in northern California  
16 during the 2009 period. <http://ameriflux.lbl.gov/>

17

18 Figure S6. Hourly observed and modeled shortwave downward radiation at Ameriflux tower sites in  
19 northern California during the 2009 period. <http://ameriflux.lbl.gov/>

20

21 Figure S7. Modeled and measured isoprene, methacrolein+methyl vinyl ketones, and MPAN at Blodgett  
22 Forest.

23

24 **Supplementary Table**

25 Table S1. FIA to BELD4 mapping scheme.

| <b>FIA.Name</b>      | <b>BELD.Name</b> | <b>BEIS.BM</b> |
|----------------------|------------------|----------------|
| Abies.amabilis       | Fir_Pacf_silver  | 1500           |
| Abies.balsamea       | Fir_balsam       | 1500           |
| Abies.bracteata      | Fir_SantaLucia   | 1500           |
| Abies.concolor       | Fir_white        | 1500           |
| Abies.fraseri        | Fir_fraser       | 1500           |
| Abies.grandis        | Fir_grand        | 1500           |
| Abies.lasiocarpa     | Fir_corkbark     | 1500           |
| Abies.magnifica      | Fir_CA_red       | 1500           |
| Abies.procera        | Fir_noble        | 1500           |
| Abies.shastensis     | Fir_Shasta_red   | 1500           |
| Abies.spp.           | Fir_spp          | 1500           |
| Acacia.farnesiana    | Acacia           | 700            |
| Acer.barbatum        | Maple_FL         | 375            |
| Acer.glabrum         | Maple_RkyMtn     | 375            |
| Acer.grandidentatum  | Maple_bigleaf    | 375            |
| Acer.leucoderme      | Maple_spp        | 375            |
| Acer.macrophyllum    | Maple_bigtooth   | 375            |
| Acer.negundo         | Maple_boxelder   | 375            |
| Acer.nigrum          | Maple_black      | 375            |
| Acer.pensylvanicum   | Maple_stripped   | 375            |
| Acer.platanoides     | Maple_Norway     | 375            |
| Acer.rubrum          | Maple_red        | 375            |
| Acer.saccharinum     | Maple_silver     | 375            |
| Acer.saccharum       | Maple_sugar      | 375            |
| Acer.spicatum        | Maple_mtn        | 375            |
| Acer.spp.            | Maple_spp        | 375            |
| Aesculus.californica | Chestnut_buckeye | 375            |
| Aesculus.flava       | Chestnut_buckeye | 375            |
| Aesculus.glabra      | Chestnut_buckeye | 375            |
| Aesculus.glabra      | Chestnut_buckeye | 375            |
| Aesculus.pavia       | Chestnut_buckeye | 375            |
| Aesculus.spp.        | Chestnut_buckeye | 375            |
| Aesculus.sylvatica   | Chestnut_buckeye | 375            |
| Ailanthus.altissima  | Ailanthus        | 375            |
| Albizia.julibrissin  | Spruce_spp       | 1500           |
| Alnus.glutinosa      | Alder            | 375            |
| Alnus.oblongifolia   | Alder            | 375            |
| Alnus.rhombifolia    | Alder            | 375            |
| Alnus.rubra          | Alder            | 375            |

|                                 |                |      |
|---------------------------------|----------------|------|
| Amelanchier.arborea             | Serviceberry   | 375  |
| Amelanchier.sanguinea           | Serviceberry   | 375  |
| Amelanchier.spp.                | Serviceberry   | 375  |
| Annona.glabra                   | Misc-hardwoods | 375  |
| Arbutus.arizonica               | Madrone        | 375  |
| Arbutus.menziesii               | Madrone        | 375  |
| Arbutus.xalapensis              | Madrone        | 375  |
| Asimina.triloba                 | Pawpaw         | 375  |
| Avicennia.germinans             | Misc-hardwoods | 375  |
| Betula.alleghaniensis           | Birch          | 375  |
| Betula.lenta                    | Birch          | 375  |
| Betula.nigra                    | Birch          | 375  |
| Betula occidentalis             | Birch          | 375  |
| Betula.papyrifera               | Birch          | 375  |
| Betula.populifolia              | Birch          | 375  |
| Betula.spp.                     | Birch          | 375  |
| Bursera.simaruba                | Oak_spp        | 375  |
| Calocedrus.decurrens            | Incense_cedar  | 1500 |
| Carpinus.caroliniana            | Hornbeam       | 375  |
| Carya.alba                      | Hickory        | 375  |
| Carya.aquatica                  | Hickory        | 375  |
| Carya.carolinae.septentrionalis | Hickory        | 375  |
| Carya.cordiformis               | Hickory        | 375  |
| Carya.glabra                    | Hickory        | 375  |
| Carya.illinoensis               | Hickory        | 375  |
| Carya.laciniosa                 | Hickory        | 375  |
| Carya.myristiciformis           | Hickory        | 375  |
| Carya.ovalis                    | Hickory        | 375  |
| Carya.ovata                     | Hickory        | 375  |
| Carya.pallida                   | Hickory        | 375  |
| Carya.spp.                      | Hickory        | 375  |
| Carya.texana                    | Hickory        | 375  |
| Castanea.dentata                | Castanea       | 375  |
| Castanea.mollissima             | Castanea       | 375  |
| Castanea.pumila                 | Castanea       | 375  |
| Castanea.pumila                 | Castanea       | 375  |
| Castanea.spp.                   | Castanea       | 375  |
| Casuarina.lepidophloia          | Oak_spp        | 375  |
| Catalpa.bignonioides            | Catalpa        | 375  |
| Catalpa.speciosa                | Catalpa        | 375  |
| Catalpa.spp.                    | Catalpa        | 375  |
| Celtis.laevigata                | Hackberry      | 375  |
| Celtis.occidentalis             | Hackberry      | 375  |

|                                   |                 |      |
|-----------------------------------|-----------------|------|
| Celtis.spp.                       | Hackberry       | 375  |
| Cercis.canadensis                 | Redbay          | 375  |
| Cercocarpus.ledifolius            | Mahogany        | 375  |
| Chamaecyparis.lawsoniana          | Cedar_chamaecyp | 1500 |
| Chamaecyparis.nootkatensis        | Cedar_chamaecyp | 1500 |
| Chamaecyparis.thyoides            | Cedar_chamaecyp | 1500 |
| Chrysolepis.chrysophylla          | Misc-hardwoods  | 375  |
| Cinnamomum.camphora               | Misc-hardwoods  | 375  |
| Citrus.spp.                       | Misc-hardwoods  | 375  |
| Cladrastis.kentukea               | Yellowwood      | 375  |
| Coccoloba.diversifolia            | Misc-hardwoods  | 375  |
| Coccothrinax.argentata            | Misc-hardwoods  | 375  |
| Condalia.hookeri                  | Spruce_spp      | 1500 |
| Conocarpus.erectus                | Misc-hardwoods  | 375  |
| Cordia.sebestena                  | Misc-hardwoods  | 375  |
| Cornus.florida                    | Dogwood         | 375  |
| Cornus.nuttallii                  | Dogwood         | 375  |
| Cotinus.obovatus                  | Smoketree       | 375  |
| Crataegus.crus.galli              | Hawthorn        | 375  |
| Crataegus.mollis                  | Hawthorn        | 375  |
| Crataegus.spp.                    | Hawthorn        | 375  |
| Cupressus.arizonica               | Cypress_cupress | 375  |
| Cupressus.bakeri                  | Cypress_cupress | 375  |
| Cupressus.macrocarpa              | Cypress_cupress | 375  |
| Cupressus.sargentii               | Cypress_cupress | 375  |
| Cupressus.spp.                    | Cypress_cupress | 375  |
| Diospyros.spp.                    | Persimmon       | 375  |
| Diospyros.texana                  | Persimmon       | 375  |
| Diospyros.virginiana              | Persimmon       | 375  |
| Ebenopsis.ebano                   | Misc-hardwoods  | 375  |
| Ehretia.anacua                    | Misc-hardwoods  | 375  |
| Elaeagnus.angustifolia            | Misc-hardwoods  | 375  |
| Eucalyptus.globulus               | Eucalyptus      | 375  |
| Eucalyptus.grandis                | Eucalyptus      | 375  |
| Eucalyptus.spp.                   | Eucalyptus      | 375  |
| Fagus.grandifolia                 | Beech           | 375  |
| Family.Arecaceae.not.listed.above | Misc-hardwoods  | 375  |
| Ficus.aurea                       | Spruce_spp      | 1500 |
| Fraxinus.americana                | Ash             | 375  |
| Fraxinus.caroliniana              | Ash             | 375  |
| Fraxinus.latifolia                | Ash             | 375  |
| Fraxinus.nigra                    | Ash             | 375  |
| Fraxinus.pennsylvanica            | Ash             | 375  |

|                         |                  |     |
|-------------------------|------------------|-----|
| Fraxinus.profunda       | Ash              | 375 |
| Fraxinus.quadrangulata  | Ash              | 375 |
| Fraxinus.spp.           | Ash              | 375 |
| Fraxinus.texensis       | Ash              | 375 |
| Fraxinus.velutina       | Ash              | 375 |
| Ginkgo.biloba           | Misc-hardwoods   | 375 |
| Gleditsia.aquatica      | Gleditsia_locust | 375 |
| Gleditsia.spp.          | Gleditsia_locust | 375 |
| Gleditsia.triacanthos   | Gleditsia_locust | 375 |
| Gordonia.lasianthus     | Loblolly_bay     | 375 |
| Guapira.discolor        | Misc-hardwoods   | 375 |
| Gymnocladus.dioicus     | KY_coffeetree    | 375 |
| Halesia.carolina        | Silverbell       | 375 |
| Halesia.diptera         | Silverbell       | 375 |
| Halesia.spp.            | Silverbell       | 375 |
| Ilex.opaca              | Holly_American   | 375 |
| Juglans.californica     | Walnut           | 375 |
| Juglans.cinerea         | Walnut           | 375 |
| Juglans.hindsii         | Walnut           | 375 |
| Juglans.major           | Walnut           | 375 |
| Juglans.microcarpa      | Walnut           | 375 |
| Juglans.nigra           | Walnut           | 375 |
| Juglans.spp.            | Walnut           | 375 |
| Juniperus.ashei         | Juniper          | 700 |
| Juniperus.californica   | Juniper          | 700 |
| Juniperus.coahuilensis  | Juniper          | 700 |
| Juniperus.deppeana      | Juniper          | 700 |
| Juniperus.flaccida      | Juniper          | 700 |
| Juniperus.monosperma    | Juniper          | 700 |
| Juniperus.occidentalis  | Juniper          | 700 |
| Juniperus.osteosperma   | Juniper          | 700 |
| Juniperus.pinchotii     | Juniper          | 700 |
| Juniperus.scopulorum    | Juniper          | 700 |
| Juniperus.spp.          | Juniper          | 700 |
| Juniperus.virginiana    | Juniper          | 700 |
| Laguncularia.racemosa   | Misc-hardwoods   | 375 |
| Larix.laricina          | Larch            | 375 |
| Larix.lyallii           | Larch            | 375 |
| Larix.occidentalis      | Larch            | 375 |
| Larix.spp.              | Larch            | 375 |
| Leucaena.pulverulenta   | Misc-hardwoods   | 375 |
| Liquidambar.styraciflua | Sweetgum         | 375 |
| Liriodendron.tulipifera | Yellow_poplar    | 375 |

|                         |                  |      |
|-------------------------|------------------|------|
| Lithocarpus.densiflorus | Tanoak           | 375  |
| Maclura.pomifera        | Osage-orange     | 375  |
| Magnolia.acuminata      | Magnolia         | 375  |
| Magnolia.fraseri        | Magnolia         | 375  |
| Magnolia.grandiflora    | Magnolia         | 375  |
| Magnolia.macrophylla    | Magnolia         | 375  |
| Magnolia.spp.           | Magnolia         | 375  |
| Magnolia.tripetala      | Magnolia         | 375  |
| Magnolia.virginiana     | Magnolia         | 375  |
| Malus.angustifolia      | Apple            | 375  |
| Malus.coronaria         | Apple            | 375  |
| Malus.fusca             | Apple            | 375  |
| Malus.ioensis           | Apple            | 375  |
| Malus.spp.              | Apple            | 375  |
| Melaleuca.quinquenervia | Cajeput          | 375  |
| Melia.azedarach         | Chinaberry       | 375  |
| Metopium.toxiferum      | Misc-hardwoods   | 375  |
| Morus.alba              | Mulberry         | 375  |
| Morus.microphylla       | Mulberry         | 375  |
| Morus.rubra             | Mulberry         | 375  |
| Morus.spp.              | Mulberry         | 375  |
| Nyssa.aquatica          | Nyssa            | 375  |
| Nyssa.biflora           | Nyssa            | 375  |
| Nyssa.ogeche            | Nyssa            | 375  |
| Nyssa.sylvatica         | Nyssa            | 375  |
| Olneya.tesota           | Robinia_locust   | 375  |
| Ostrya.virginiana       | East_hophornbean | 375  |
| Oxydendrum.arboreum     | Sourwood         | 375  |
| Paulownia.tomentosa     | Paulownia        | 375  |
| Persea.borbonia         | Misc-hardwoods   | 375  |
| Eugenia.rhombea         | Misc-hardwoods   | 375  |
| Persea.spp.             | Misc-hardwoods   | 375  |
| Picea.abies             | Spruce_Norway    | 1500 |
| Picea.breweriana        | Spruce_Brewer    | 1500 |
| Picea.engelmannii       | Spruce_Engelmann | 1500 |
| Picea.glauca            | Spruce_white     | 1500 |
| Picea.mariana           | Spruce_black     | 1500 |
| Picea.pungens           | Spruce_blue      | 1500 |
| Picea.rubens            | Spruce_red       | 1500 |
| Picea.sitchensis        | Spruce_Sitka     | 1500 |
| Picea.spp.              | Spruce_spp       | 1500 |
| Pinus.albicaulis        | Pine_whitebark   | 700  |
| Pinus.aristata          | Pine_brstlcone   | 700  |

|                       |                  |     |
|-----------------------|------------------|-----|
| Pinus.arizonica       | Pine_AZ          | 700 |
| Pinus.attenuata       | Pine_knobcone    | 700 |
| Pinus.balfouriana     | Pine_foxtail     | 700 |
| Pinus.banksiana       | Pine_jack        | 700 |
| Pinus.cembroides      | Pine_pinyon      | 700 |
| Pinus.clausa          | Pine_sand        | 700 |
| Pinus.contorta        | Pine_lodgepole   | 700 |
| Pinus.coulteri        | Pine_Coulter     | 700 |
| Pinus.discolor        | Pine_pinyon_brdr | 700 |
| Pinus.echinata        | Pine_shortleaf   | 700 |
| Pinus.edulis          | Pine_pinyon_cmn  | 700 |
| Pinus.elliottii       | Pine_slash       | 700 |
| Pinus.engelmannii     | Pine_Apache      | 700 |
| Pinus.flexilis        | Pine_limber      | 700 |
| Pinus.glabra          | Pine_spruce      | 700 |
| Pinus.jeffreyi        | Pine_Jeffrey     | 700 |
| Pinus.lambertiana     | Pine_sugar       | 700 |
| Pinus.leiophylla      | Pine_chihuahua   | 700 |
| Pinus.longaeva        | Pine_brstlccone  | 700 |
| Pinus.monophylla      | Pine_pinyon      | 700 |
| Pinus.monticola       | Pine_Wwhite      | 700 |
| Pinus.muricata        | Pine_Bishop      | 700 |
| Pinus.nigra           | Pine_Austrian    | 700 |
| Pinus.palustris       | Pine_longleaf    | 700 |
| Pinus.ponderosa       | Pine_ponderosa   | 700 |
| Pinus.pungens         | Pine_tablemtn    | 700 |
| Pinus.radiata         | Pine_Monterey    | 700 |
| Pinus.remota          | Pine_pinyon      | 700 |
| Pinus.resinosa        | Pine_red         | 700 |
| Pinus.rigida          | Pine_pitch       | 700 |
| Pinus.sabiniana       | Pine_digger      | 700 |
| Pinus.serotina        | Pine_pond        | 700 |
| Pinus.spp.            | Pine_pinyon      | 700 |
| Pinus.strobiformis    | Pine_Swwhite     | 700 |
| Pinus.strobus         | Pine_Ewhite      | 700 |
| Pinus.sylvestris      | Pine_scotch      | 700 |
| Pinus.taeda           | Pine_loblolly    | 700 |
| Pinus.virginiana      | Pine_VA          | 700 |
| Pinus.washoensis      | Pine_Washoe      | 700 |
| Piscidia.piscipula    | Misc-hardwoods   | 375 |
| Planera.aquatica      | Water-elm        | 375 |
| Platanus.occidentalis | Sycamore         | 375 |
| Platanus.racemosa     | Sycamore         | 375 |



|                        |                 |      |
|------------------------|-----------------|------|
| Platanus.spp.          | Sycamore        | 375  |
| Platanus.wrightii      | Sycamore        | 375  |
| Populus.alba           | Populus         | 375  |
| Populus.angustifolia   | Populus         | 375  |
| Populus.balsamifera    | Populus         | 375  |
| Populus.deltoides      | Populus         | 375  |
| Populus.fremontii      | Populus         | 375  |
| Populus.grandidentata  | Populus         | 375  |
| Populus.heterophylla   | Populus         | 375  |
| Populus.nigra          | Populus         | 375  |
| Populus.spp.           | Populus         | 375  |
| Populus.tremuloides    | Populus         | 375  |
| Prosopis.glandulosa    | Mesquite        | 375  |
| Prosopis.pubescens     | Mesquite        | 375  |
| Prosopis.spp.          | Mesquite        | 375  |
| Prosopis.velutina      | Mesquite        | 375  |
| Prunus.americana       | Prunus          | 375  |
| Prunus.avium           | Prunus          | 375  |
| Prunus.cerasus         | Prunus          | 375  |
| Prunus.emarginata      | Prunus          | 375  |
| Prunus.nigra           | Prunus          | 375  |
| Prunus.pensylvanica    | Prunus          | 375  |
| Prunus.persica         | Prunus          | 375  |
| Prunus.serotina        | Prunus          | 375  |
| Prunus.spp.            | Prunus          | 375  |
| Prunus.virginiana      | Prunus          | 375  |
| Pseudotsuga.macrocarpa | Douglas_fir     | 1500 |
| Pseudotsuga.menziesii  | Douglas_fir     | 1500 |
| Quercus.agrifolia      | Oak_CA_live     | 375  |
| Quercus.alba           | Oak_white       | 375  |
| Quercus.arizonica      | Oak_AZ_white    | 375  |
| Quercus.bicolor        | Oak_swamp_white | 375  |
| Quercus.buckleyi       | Oak_spp         | 375  |
| Quercus.chrysolepis    | Oak_canyon_live | 375  |
| Quercus.coccinea       | Oak_scarlet     | 375  |
| Quercus.douglasii      | Oak_blue        | 375  |
| Quercus.ellipsoidalis  | Oak_Northrn_pin | 375  |
| Quercus.emoryi         | Oak_Emercy      | 375  |
| Quercus.engelmannii    | Oak_Engelmann   | 375  |
| Quercus.falcata        | Oak_Southrn_red | 375  |
| Quercus.gambelii       | Oak_Gambel      | 375  |
| Quercus.garryana       | Oak_OR_white    | 375  |
| Quercus.graciliformis  | Oak_spp         | 375  |

|                        |                  |     |
|------------------------|------------------|-----|
| Quercus.gravesii       | Oak_spp          | 375 |
| Quercus.grisea         | Oak_spp          | 375 |
| Quercus.hypoleucoides  | Oak_silverleaf   | 375 |
| Quercus.ilicifolia     | Oak_bear         | 375 |
| Quercus.imbricaria     | Oak_shingle      | 375 |
| Quercus.incana         | Oak_bluejack     | 375 |
| Quercus.kelloggii      | Oak_CA_black     | 375 |
| Quercus.laceyi         | Oak_spp          | 375 |
| Quercus.laevis         | Oak_turkey       | 375 |
| Quercus.laurifolia     | Oak_laurel       | 375 |
| Quercus.lobata         | Oak_CA_white     | 375 |
| Quercus.lyrata         | Oak_overcup      | 375 |
| Quercus.macrocarpa     | Oak_bur          | 375 |
| Quercus.margarettae    | Oak_spp          | 375 |
| Quercus.marilandica    | Oak_blackjack    | 375 |
| Quercus.michauxii      | Oak_swamp_cnut   | 375 |
| Quercus.minima         | Oak_spp          | 375 |
| Quercus.muehlenbergii  | Oak_chinkapin    | 375 |
| Quercus.nigra          | Oak_water        | 375 |
| Quercus.oblongifolia   | Oak_Mexicanblue  | 375 |
| Quercus.oglethorpensis | Oak_spp          | 375 |
| Quercus.pagoda         | Oak_spp          | 375 |
| Quercus.palustris      | Oak_pin          | 375 |
| Quercus.phellos        | Oak_willow       | 375 |
| Quercus.prinoides      | Oak_spp          | 375 |
| Quercus.prinus         | Oak_chestnut     | 375 |
| Quercus.rubra          | Oak_Northrn_red  | 375 |
| Quercus.rugosa         | Oak_spp          | 375 |
| Quercus.shumardii      | Oak_Shumrd_red   | 375 |
| Quercus.similis        | Oak_spp          | 375 |
| Quercus.sinuata        | Oak_Durand       | 375 |
| Quercus.spp.           | Oak_spp          | 375 |
| Quercus.stellata       | Oak_post         | 375 |
| Quercus.texana         | Oak_nuttall      | 375 |
| Quercus.velutina       | Oak_black        | 375 |
| Quercus.virginiana     | Oak_live         | 375 |
| Quercus.wislizeni      | Oak_interio_live | 375 |
| Rhizophora.mangle      | Misc-hardwoods   | 375 |
| Robinia.pseudoacacia   | Robinia_locust   | 375 |
| Roystonea.spp.         | Misc-hardwoods   | 375 |
| Sabal.palmetto         | Misc-hardwoods   | 375 |
| Salix.alba             | Willow           | 375 |
| Salix.amygdaloides     | Willow           | 375 |

|                          |                  |      |
|--------------------------|------------------|------|
| Salix.bebbiana           | Willow           | 375  |
| Salix.caroliniana        | Willow           | 375  |
| Salix.nigra              | Willow           | 375  |
| Salix.pyrifolia          | Willow           | 375  |
| Salix.sepulcralis        | Willow           | 375  |
| Salix.spp.               | Willow           | 375  |
| Sapindus.saponaria       | Soapberry_westrn | 375  |
| Sassafras.albidum        | Sassafras        | 375  |
| Sequoia.sempervirens     | Sequoia          | 1500 |
| Sequoiadendron.giganteum | Sequoia          | 1500 |
| Sideroxylon.lanuginosum  | Bumelia_gum      | 375  |
| Sideroxylon.salicifolium | Bumelia_gum      | 375  |
| Sophora.affinis          | Robinia_locust   | 375  |
| Sorbus.americana         | Mountain_ash     | 375  |
| Sorbus.aucuparia         | Mountain_ash     | 375  |
| Sorbus.decora            | Mountain_ash     | 375  |
| Sorbus.spp.              | Mountain_ash     | 375  |
| Swietenia.mahagoni       | Misc-hardwoods   | 375  |
| Syzygium.cumini          | Misc-hardwoods   | 375  |
| Tamarix.spp.             | Tamarix          | 375  |
| Taxodium.ascendens       | Cypress_taxodium | 375  |
| Taxodium.distichum       | Cypress_taxodium | 375  |
| Taxus.brevifolia         | Misc-hardwoods   | 375  |
| Thrinax.morrisii         | Willow           | 375  |
| Thuja.occidentalis       | Cedar_thuja      | 1500 |
| Thuja.plicata            | Cedar_thuja      | 1500 |
| Tilia.americana          | Basswood         | 375  |
| Tilia.spp.               | Basswood         | 375  |
| Torreya.californica      | Torreya          | 375  |
| Tree.broadleaf           | Misc-hardwoods   | 375  |
| Tree.evergreen           | Mixed_conifer_sp | 700  |
| Tree.unknown             | Misc-hardwoods   | 375  |
| Triadica.sebifera        | Tallowtree-chins | 375  |
| Tsuga.canadensis         | Hemlock          | 700  |
| Tsuga.caroliniana        | Hemlock          | 700  |
| Tsuga.heterophylla       | Hemlock          | 700  |
| Tsuga.mertensiana        | Hemlock          | 700  |
| Tsuga.spp.               | Hemlock          | 700  |
| Ulmus.alata              | Elm              | 375  |
| Ulmus.americana          | Elm              | 375  |
| Ulmus.crassifolia        | Elm              | 375  |
| Ulmus.pumila             | Elm              | 375  |
| Ulmus.rubra              | Elm              | 375  |

|    |                          |                |     |
|----|--------------------------|----------------|-----|
|    | Ulmus.serotina           | Elm            | 375 |
|    | Ulmus.spp.               | Elm            | 375 |
|    | Ulmus.thomasii           | Elm            | 375 |
|    | Umbellularia.californica | Califor-laurel | 375 |
|    | Vernicia.fordii          | Tung-oil-tree  | 375 |
| 26 |                          |                |     |
| 27 |                          |                |     |
| 28 |                          |                |     |
| 29 |                          |                |     |
| 30 |                          |                |     |
