# Supplementary figures and images for: Evaluation of improved land use and canopy representation in BEIS v3.61 with biogenic VOC measurements in California
Source: Copernicus journal article supplement (doi:10.5194/gmd-9-2191-2016), 2016-06-16

## Temperature

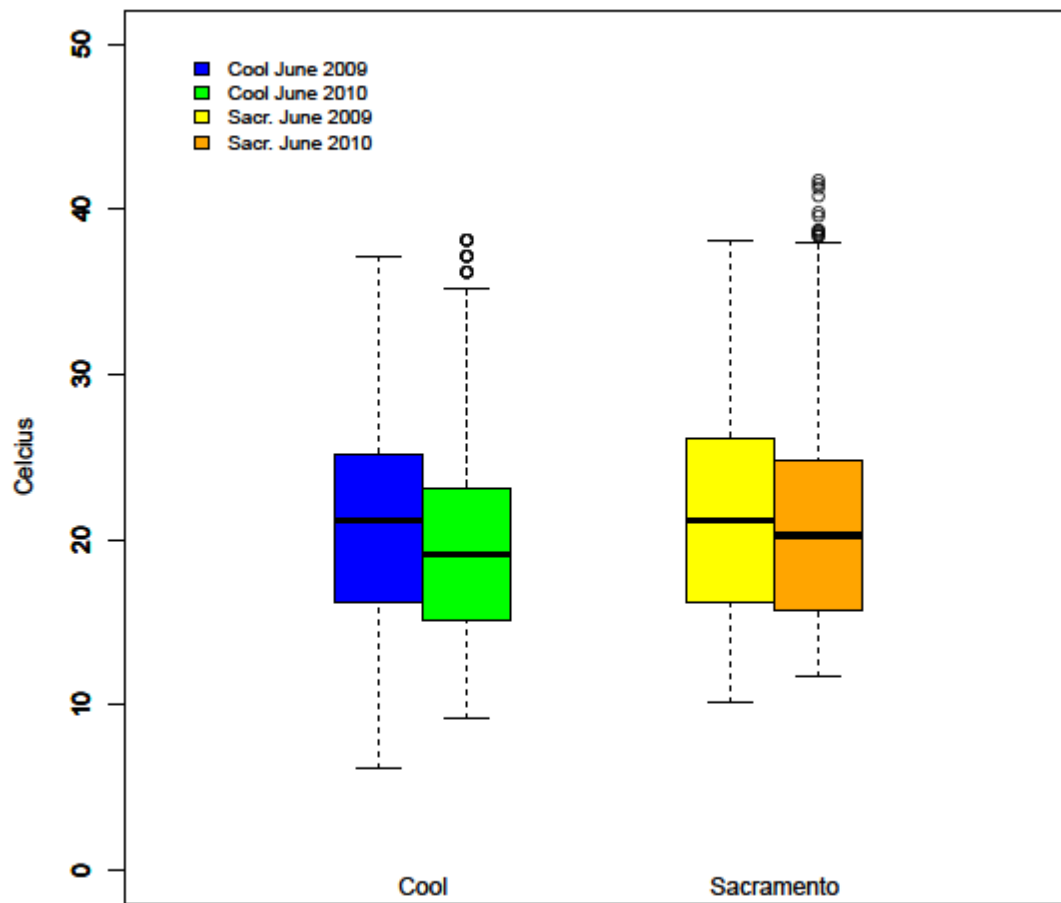

Supplement: Supplementary file 1 [file gmd-9-2191-2016-supplement.zip]

SW Down - VairaRanch 2009

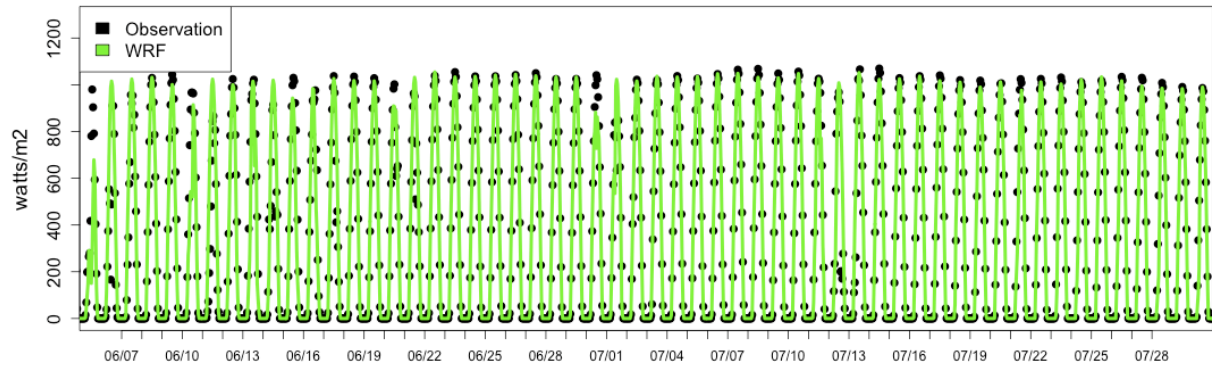

SW Down - TwitchellII 2009

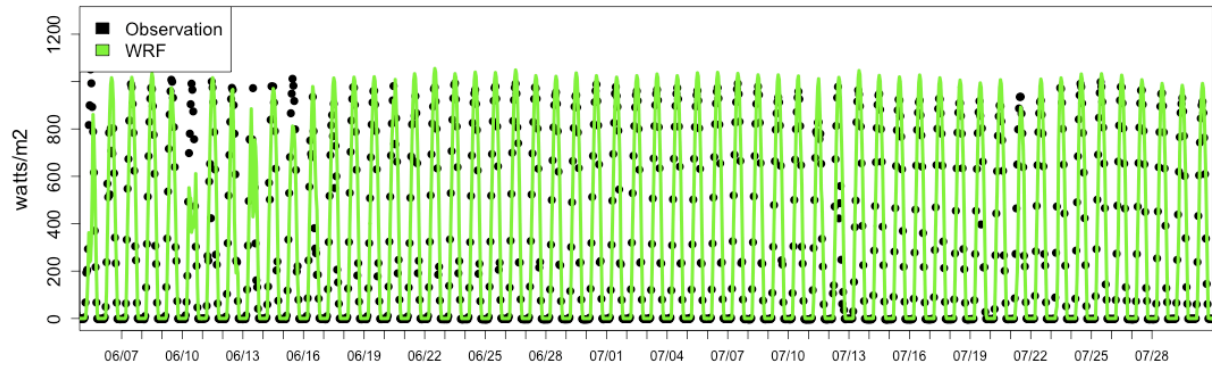

SW Down - TonziRanch 2009

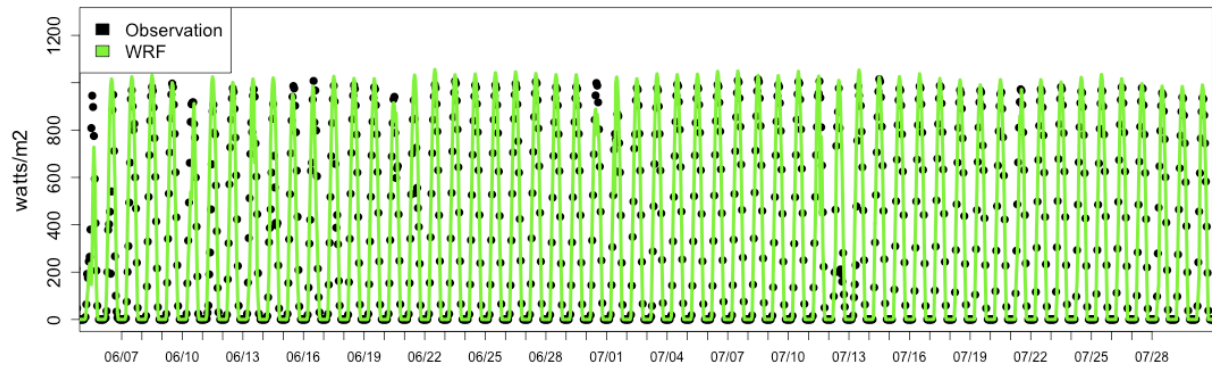

Supplement: Supplementary file 2 [file gmd-9-2191-2016-supplement.zip]

Temperature - Blodgett Forest (BEARPEX) 2009

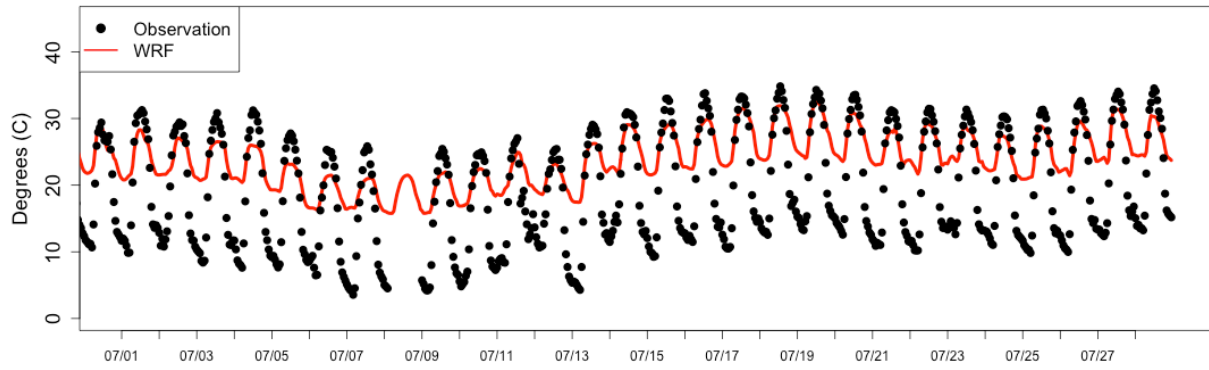

Temperature - Cool 2009

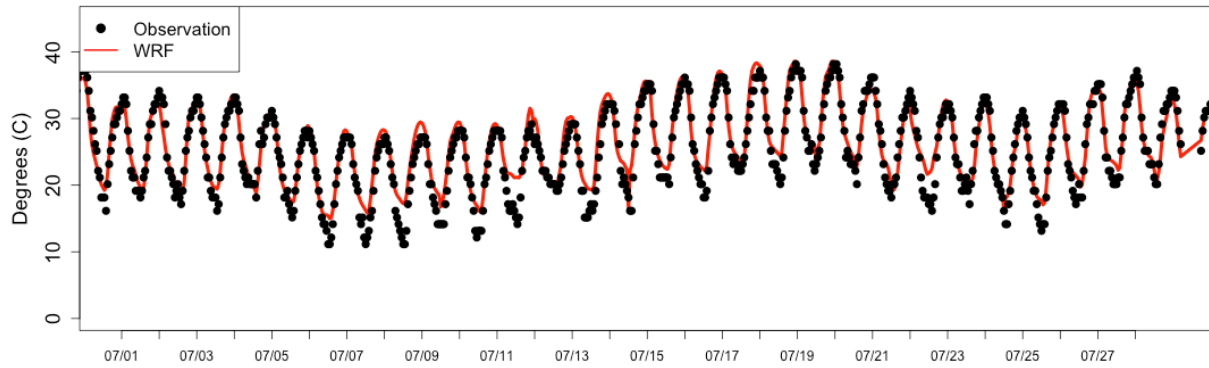

Temperature - Sacramento 2009

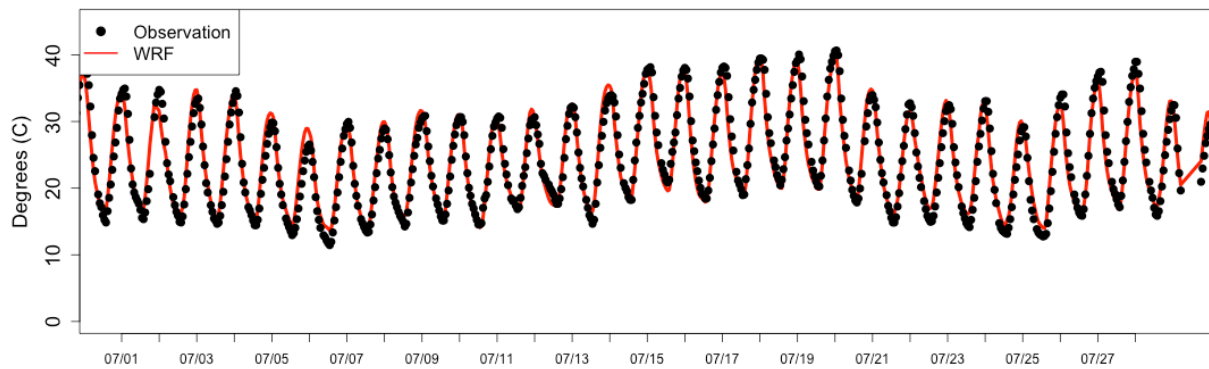

Supplement: Supplementary file 5 [file gmd-9-2191-2016-supplement.zip]

Temperature - VairaRanch 2009

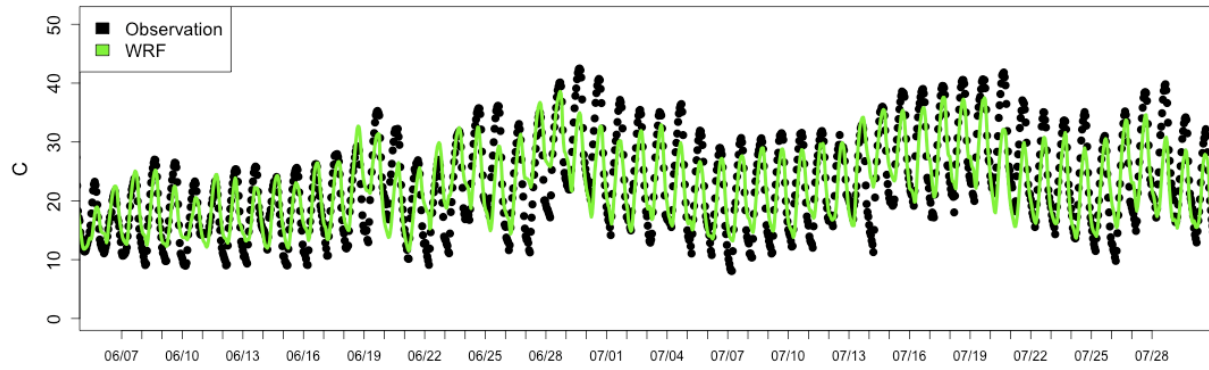

Temperature - Twitchell 2009

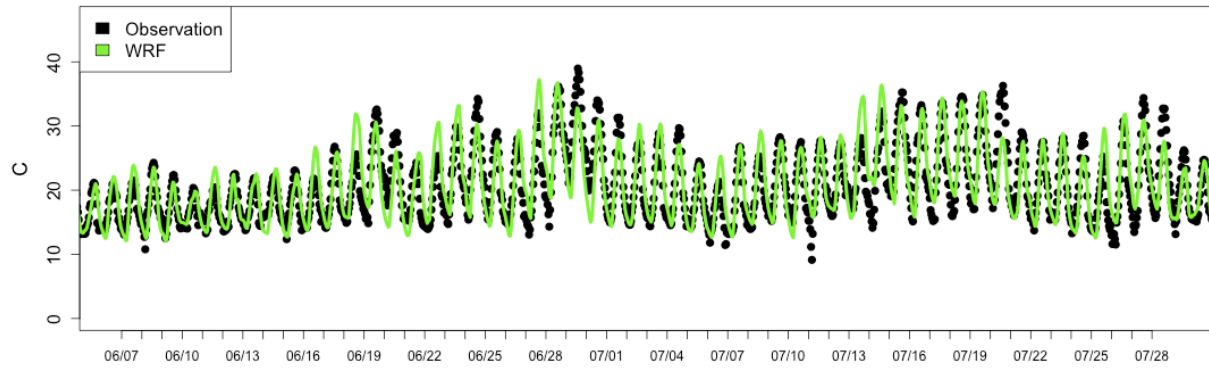

Temperature - Tonziranch 2009

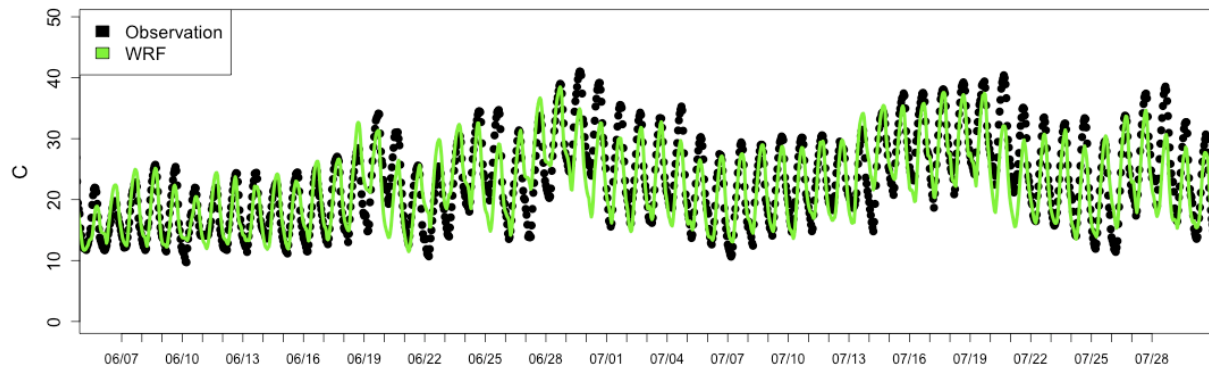

Supplement: Supplementary file 6 [file gmd-9-2191-2016-supplement.zip]

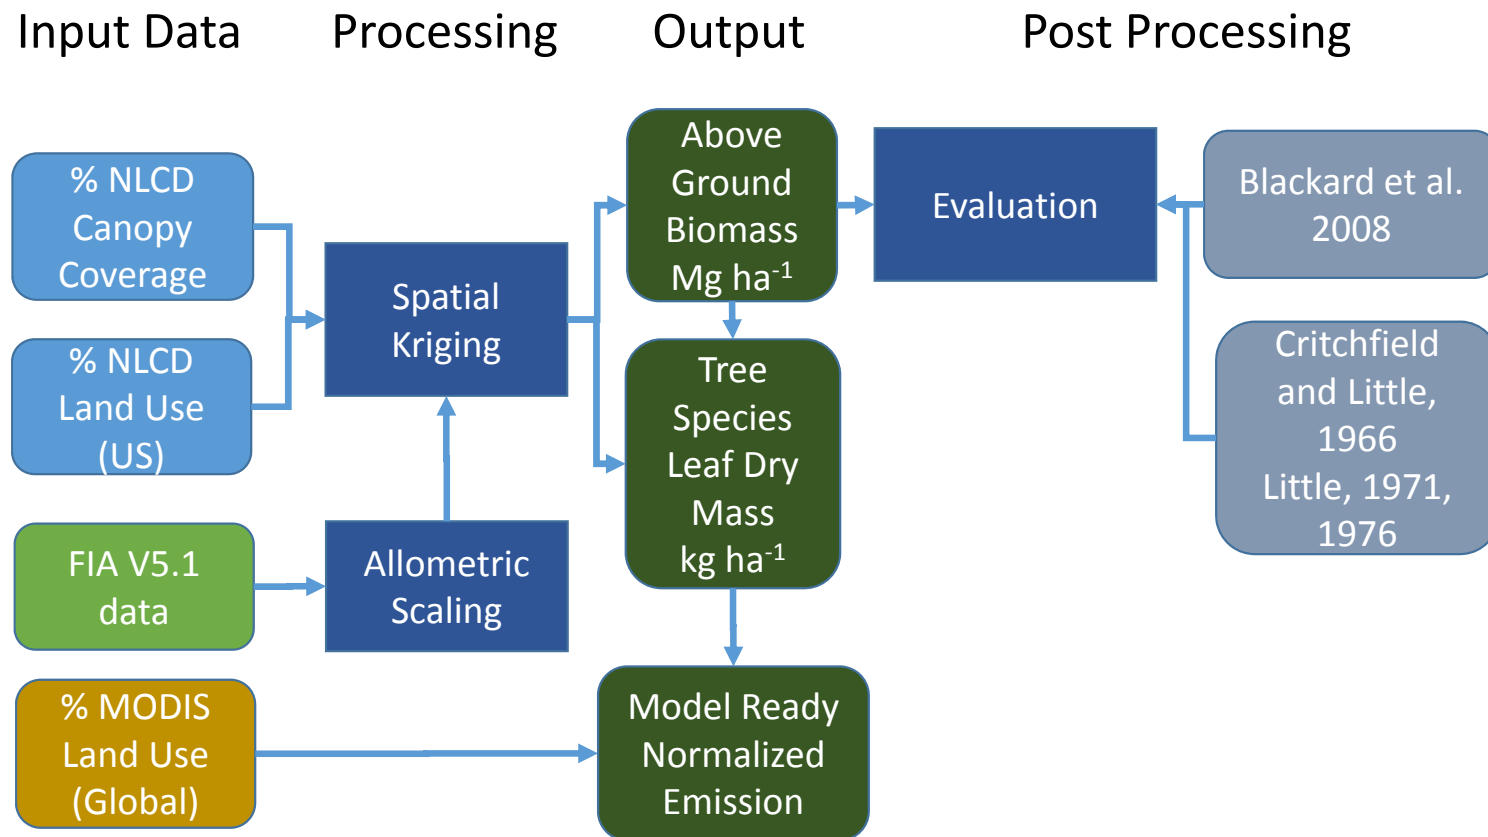

Supplement: Supplementary file 7 [file gmd-9-2191-2016-supplement.zip]

**BELD3 Oak**

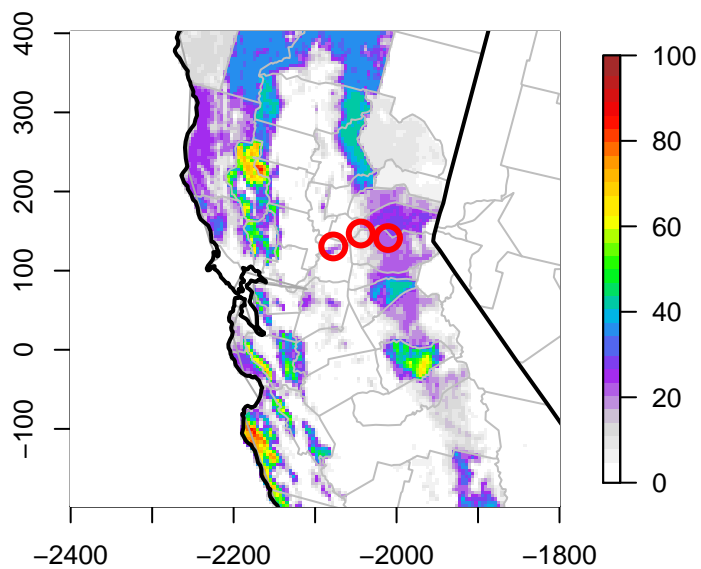

**BELD4 Oak**

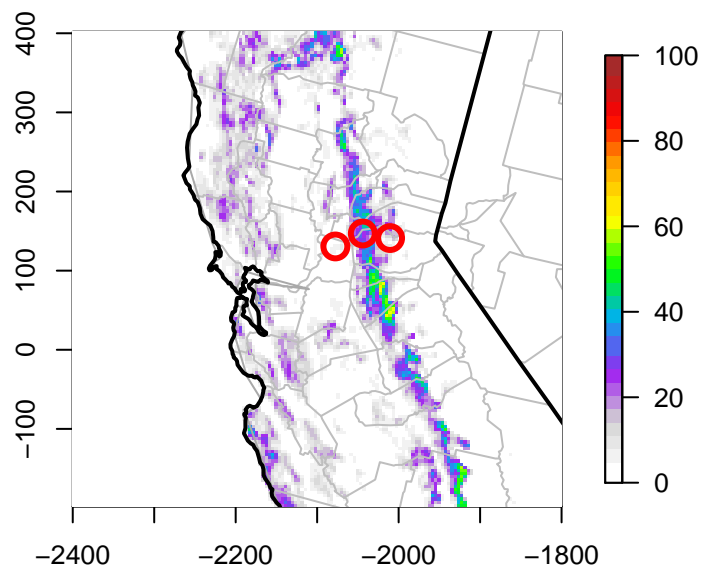

**BELD3 Needle Leaf**

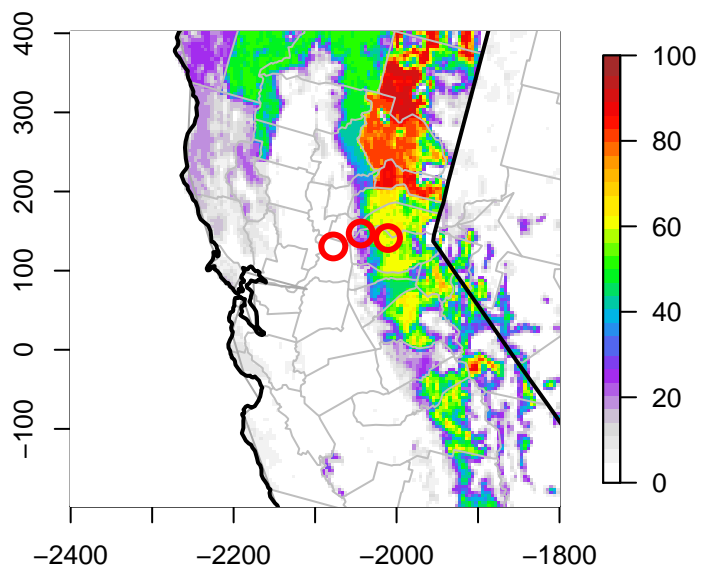

**BELD4 Needle Leaf**

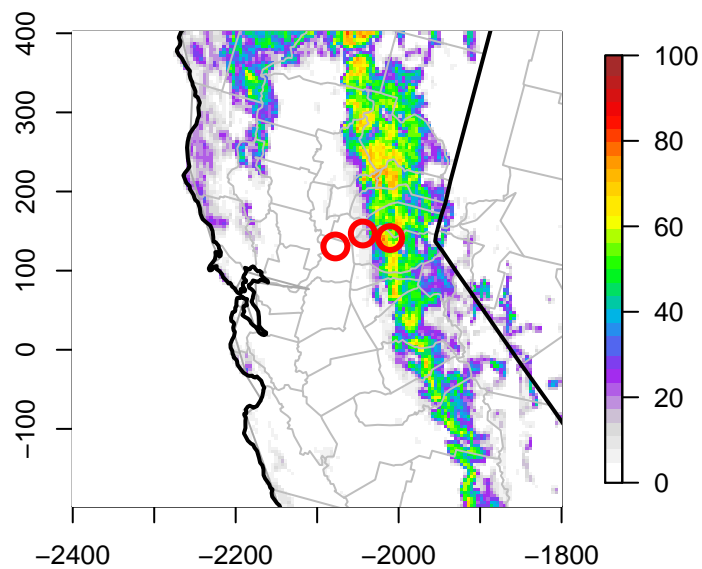

Supplement: Supplementary file 8 [file gmd-9-2191-2016-supplement.zip]

Isoprene – BEARPEX 2009

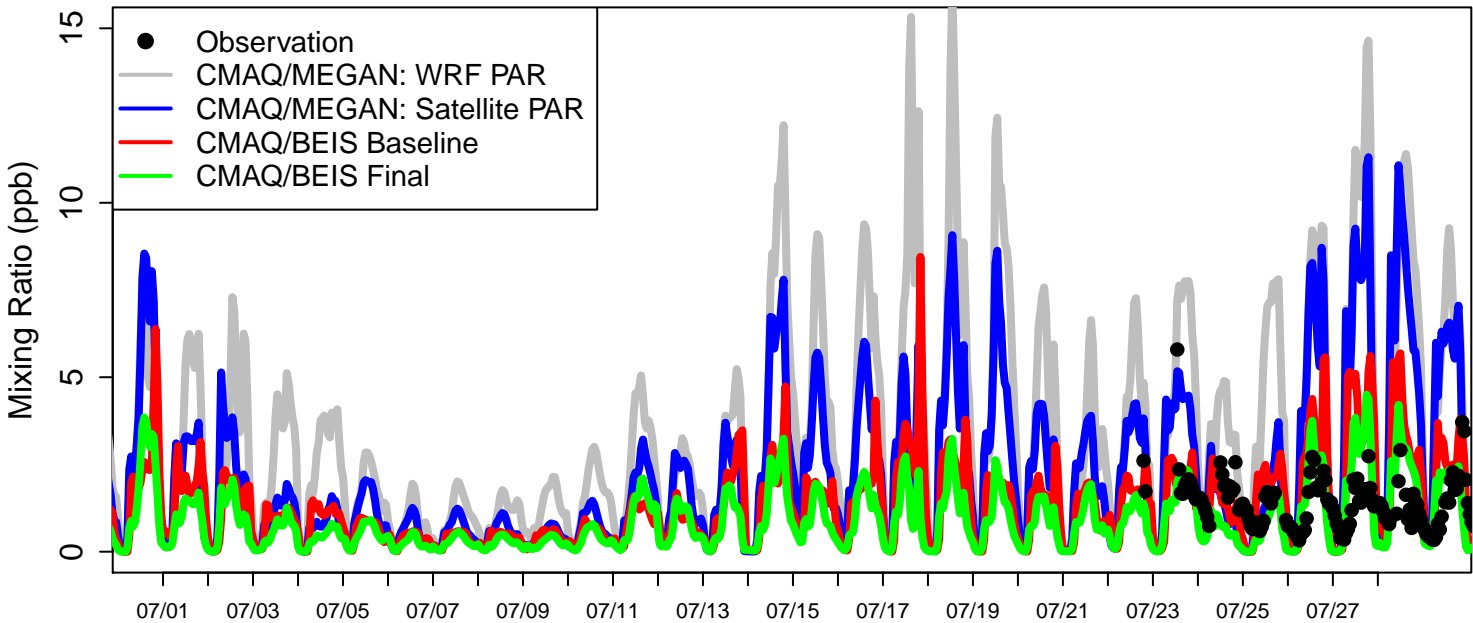

Methacrolein + Methyl Vinyl Ketone – BEARPEX 2009

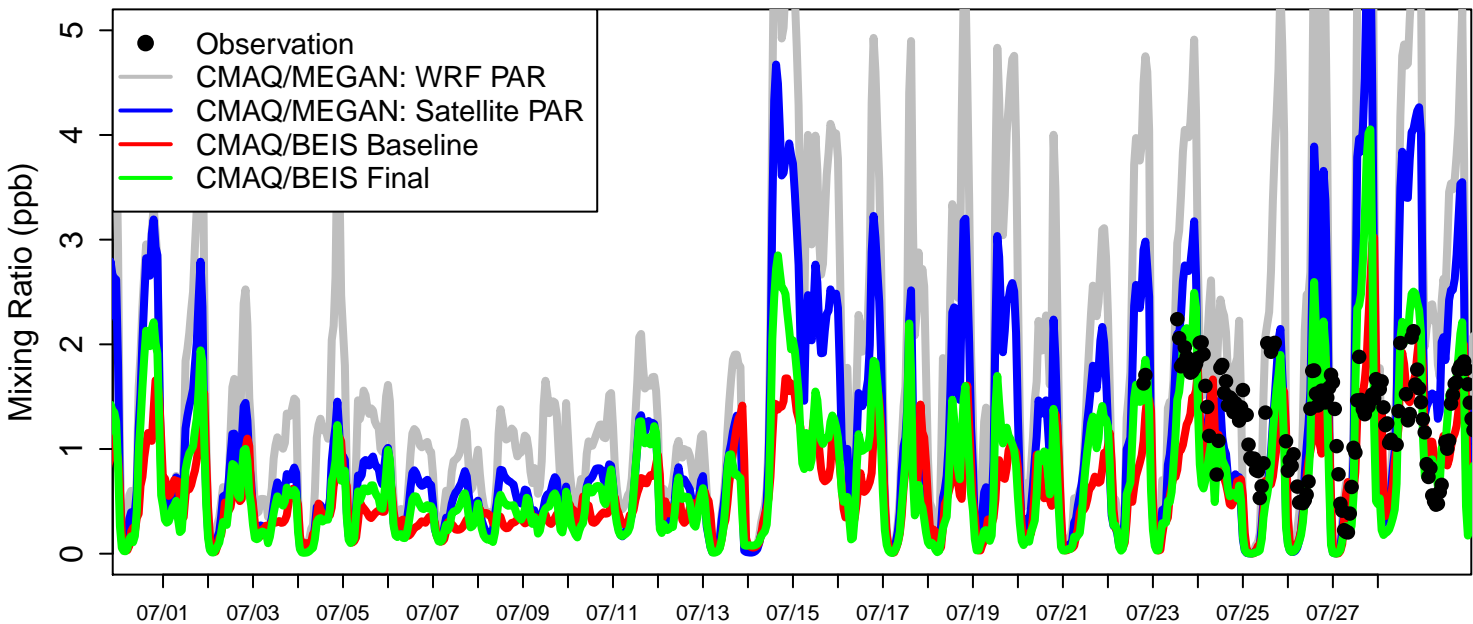

MPAN – BEARPEX 2009

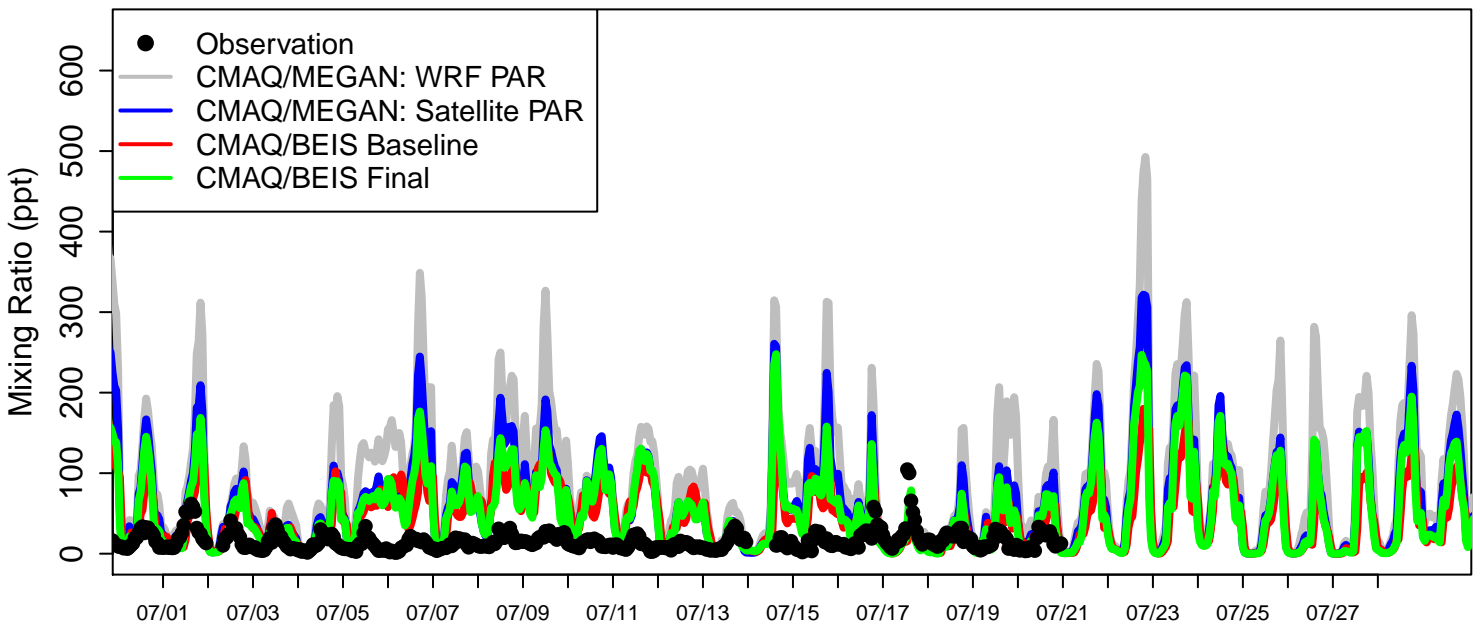

Supplement: Supplementary file 9 [file gmd-9-2191-2016-supplement.zip]
